# Supplementary material for: Diagnostic and Prognostic Biomarkers in the Rational Assessment of Mesothelioma (DIAPHRAGM) study: protocol of a prospective, multicentre, observational study
Source: PubMed Central journal article supplement — BMJ Open. 2016 Nov 24;6(11):e013324. doi: 10.1136/bmjopen-2016-013324 (PMC5168514; doi:10.1136/bmjopen-2016-013324), 2016-11-24
Supplement: bmjopen-2016-013324supp_appendix3.pdf [file bmjopen-2016-013324supp_appendix3.pdf]

|  <b>CANCER RESEARCH UK</b><br>Clinical Trials Unit, Glasgow |                      | <h2 style="margin: 0;">ASBESTOS EXPOSURE QUESTIONNAIRE</h2> <p style="margin: 0;">(to be completed for all patients on study)</p> |                  |                            |                                                                |                                                             |                                                            |                                                       |                                                                             |
|----------------------------------------------------------------------------------------------------------------------------------------------|----------------------|-----------------------------------------------------------------------------------------------------------------------------------|------------------|----------------------------|----------------------------------------------------------------|-------------------------------------------------------------|------------------------------------------------------------|-------------------------------------------------------|-----------------------------------------------------------------------------|
| <h3 style="margin: 0;">DIAPHRAGM: Diagnostic and Prognostic biomarkers in the Rational Assessment of Mesothelioma</h3>                       |                      |                                                                                                                                   |                  |                            |                                                                |                                                             |                                                            |                                                       |                                                                             |
| <b>PATIENT INITIALS:</b> (f) _____ (s) _____                                                                                                 |                      |                                                                                                                                   |                  |                            | <b>DATE of BIRTH:</b> <u>DD</u> / <u>MON</u> / <u>YYYY</u>     |                                                             |                                                            |                                                       |                                                                             |
| <b>INVESTIGATOR:</b>                                                                                                                         |                      |                                                                                                                                   |                  |                            | <b>REGISTRATION DATE:</b> <u>DD</u> / <u>MON</u> / <u>YYYY</u> |                                                             |                                                            |                                                       |                                                                             |
| <b>SITE:</b>                                                                                                                                 |                      |                                                                                                                                   |                  |                            | <b>PATIENT TRIAL IDENTIFIER:</b>                               |                                                             |                                                            |                                                       |                                                                             |
| <b>DATE OF COMPLETION OF QUESTIONNAIRE:</b> <u>DD</u> / <u>MON</u> / <u>YYYY</u>                                                             |                      |                                                                                                                                   |                  |                            |                                                                |                                                             |                                                            |                                                       |                                                                             |
| <h3 style="margin: 0;">Employment History <span style="float: right;">No known asbestos exposure <input type="checkbox"/></span></h3>        |                      |                                                                                                                                   |                  |                            |                                                                |                                                             |                                                            |                                                       |                                                                             |
| Industry / Occupation<br>e.g. joiner, shipyard worker                                                                                        | Period of Employment |                                                                                                                                   |                  | No. of<br>Hours<br>per day | Days<br>per<br>week                                            | Airway<br>protection?                                       | Job Type<br><small>Please refer to<br/>codes below</small> | Job Code<br><small>Please refer to<br/>Page 2</small> | Indirect Exposure<br>Details<br><small>e.g. via husband, via father</small> |
|                                                                                                                                              | Start Year           | No. of<br>Years                                                                                                                   | No. of<br>Months |                            |                                                                |                                                             |                                                            |                                                       |                                                                             |
| 1.                                                                                                                                           | YYYY                 |                                                                                                                                   |                  | _____                      | _____                                                          | Yes <input type="checkbox"/><br>No <input type="checkbox"/> |                                                            |                                                       |                                                                             |
| 2.                                                                                                                                           | YYYY                 |                                                                                                                                   |                  | _____                      | _____                                                          | Yes <input type="checkbox"/><br>No <input type="checkbox"/> |                                                            |                                                       |                                                                             |
| 3.                                                                                                                                           | YYYY                 |                                                                                                                                   |                  | _____                      | _____                                                          | Yes <input type="checkbox"/><br>No <input type="checkbox"/> |                                                            |                                                       |                                                                             |
| 4.                                                                                                                                           | YYYY                 |                                                                                                                                   |                  | _____                      | _____                                                          | Yes <input type="checkbox"/><br>No <input type="checkbox"/> |                                                            |                                                       |                                                                             |
| 5.                                                                                                                                           | YYYY                 |                                                                                                                                   |                  | _____                      | _____                                                          | Yes <input type="checkbox"/><br>No <input type="checkbox"/> |                                                            |                                                       |                                                                             |

**JOB TYPE:** **M** = Manufacturing asbestos products **S** = Asbestos Stripping/Removal **O** = Something else **I** = Indirect exposure

Version 2, 7<sup>th</sup> Jan 2015

Please return completed form to: Clinical Trial Coordinator – DIAPHRAGM Study  
 CRUK Clinical Trials Unit, Level 0, The Beatson West of Scotland Cancer Centre, 1053 Great Western Road, Glasgow, G12 0YN

## Job Codes (Taken from Appendix 5 of the HSE Asbestos Survey)

### CODE LIST M

|                                                              |    |                                                                  |
|--------------------------------------------------------------|----|------------------------------------------------------------------|
| <b>Textile manufacture</b>                                   | 42 | Other exposed worker                                             |
| 01 Raw material store                                        |    |                                                                  |
| 02 Raw material & finished product transport                 |    |                                                                  |
| 03 Disintegrating/heating/opening/fibrising                  |    | <b>Asbestos board and paper manufacture</b>                      |
| 04 Hopper feeding                                            | 43 | Raw material store                                               |
| 05 Carding                                                   | 44 | Raw material transport                                           |
| 06 Weaving                                                   | 45 | Disintegrating/opening/fibrising                                 |
| 07 Spinning                                                  | 46 | Mixing/beating                                                   |
| 08 Doubling/twisting                                         | 47 | Handling wet mixture                                             |
| 09 Braiding                                                  | 48 | Drying                                                           |
| 10 Warping                                                   | 49 | Handling dry mixture                                             |
| 11 Detritus handling                                         | 50 | Cutting/machining                                                |
| 12 Inspecting                                                | 51 | Store/transport/packing/dispatching products                     |
| 13 Supervising                                               | 52 | Supervising                                                      |
| 14 Finished product store & dispatch                         | 53 | Detritus handling                                                |
| 15 Other exposed workers                                     | 54 | Inspecting                                                       |
| 95 'Fortex' process                                          | 55 | Other exposed workers                                            |
|                                                              |    | <b>Garment manufacture</b>                                       |
| <b>Asbestos cement mixture board and pipe manufacture</b>    | 56 | Cloth store                                                      |
| 16 Supervising                                               | 57 | Cutting out                                                      |
| 17 Raw material store                                        | 58 | Stitching                                                        |
| 18 Raw material transport                                    | 59 | Transport of materials                                           |
| 19 Disintegrating                                            | 60 | Storing/packing/dispatching                                      |
| 20 Mixing/beating                                            | 61 | Inspecting                                                       |
| 21 Wet board or pipe manufacture                             | 62 | Supervising                                                      |
| 22 Wet board or pipe handling                                | 63 | Other exposed workers                                            |
| 23 Drying                                                    |    | <b>Manufacture of dry mixes for insulation &amp; plastering</b>  |
| 24 Dry board handling                                        | 70 | Raw material stores                                              |
| 25 Machining or cutting                                      | 71 | Raw material handling/bag tipping/weighting/mixing               |
| 26 Sanding                                                   | 72 | Packaging                                                        |
| 27 Inspecting                                                | 73 | Stores and dispatch                                              |
| 28 Finished product store/packing/dispatch/transport         | 74 | Other exposed workers                                            |
| 29 Detritus handling wet                                     |    | <b>Maintenance workers all manufacturing sectors</b>             |
| 30 Detritus handling dry                                     | 75 | Supervising                                                      |
| 31 Other exposed worker                                      | 76 | Fault finder/machine fitter/installation engineer/plant engineer |
|                                                              | 77 | Labour to plant engineers etc                                    |
| <b>Manufacture of asbestos/rubber/resin bitumen mixtures</b> | 78 | Carpenters/joiners                                               |
| 32 Raw material store                                        | 79 | Electrician                                                      |
| 33 Transporting raw materials                                | 80 | Plumber                                                          |
| 34 Disintegrating                                            | 81 | Other building trade craftsmen eg painter                        |
| 35 Handling raw fibre (bag tipping/weighting/mixing)         | 82 | Labourer to building trade craftsman                             |
| 36 Pressing/moulding                                         | 83 | Ventilation plant servicing                                      |
| 37 Cutting/finishing/machining                               | 84 | Factory cleaning                                                 |
| 38 Transporting finished product                             |    |                                                                  |
| 39 Finished product storage/packing/dispatching              |    |                                                                  |
| 40 Inspecting                                                |    |                                                                  |
| 41 Supervising                                               |    |                                                                  |

### CODE LIST S

|                                   |    |                                                         |
|-----------------------------------|----|---------------------------------------------------------|
| <b>Asbestos stripping/removal</b> | 65 | Stripping/encapsulating                                 |
| 64 Supervising                    | 69 | Other exposed workers (eg sampler, cleaner, scaffolder) |

### CODE LIST O

|                                              |     |                                                             |
|----------------------------------------------|-----|-------------------------------------------------------------|
| <b>Ship building, repair, &amp; breaking</b> | 97  | Asbestos board cutting/fitting                              |
| 85 Asbestos storeman                         | 98  | Asbestos roofing construction and maintenance               |
| 86 Laggings                                  | 99  | Demolition                                                  |
| 87 Boilermakers and installers               | 104 | Other building trade craftsmen eg painter (81) <sup>†</sup> |
| 88 Carpenters/joiners                        | 105 | Labourer to building trade craftsman (82)                   |
| 89 Plumber                                   | 106 | Plumber (80)                                                |
| 90 Engine fitter                             | 107 | Carpenters/joiners (78)                                     |
| 91 Other exposed workers                     |     | <b>Miscellaneous processes</b>                              |
| 92 Asbestos stripping                        | 101 | Use of asbestos string/rope/felt (65)                       |
| 93 Cleaner                                   | 102 | Fitting clutch and brake pads (37)                          |
| 94 Shipbreaking                              | 108 | Machining/cutting asbestos/resin board (50)                 |
|                                              | 109 | Other exposed workers (69)                                  |
| <b>Building &amp; construction</b>           |     |                                                             |
| 96 Heating engineer                          |     |                                                             |

Version 2, 7<sup>th</sup> Jan 2015

Please return completed form to: Clinical Trial Coordinator – DIAPHRAGM Study  
CRUK Clinical Trials Unit, Level 0, The Beatson West of Scotland Cancer Centre,  
1053 Great Western Road, Glasgow, G12 0YN
